# Supplementary material for: Dehydrogenation of propane over a hydrothermal-synthesized Ga2O3–Al2O3catalyst in the presence of carbon dioxide
Source: Royal Society of Chemistry journal article supplement (doi:10.1039/c5cy02161h), 2016-01-01
Supplement: c5cy02161h1.pdf [file c5cy02161h1.pdf]

*Supporting Information for*

**Dehydrogenation of propane over hydrothermal synthesized Ga<sub>2</sub>O<sub>3</sub>–  
Al<sub>2</sub>O<sub>3</sub> catalyst in the presence of carbon dioxide**

**He Xiao,<sup>a,b</sup> Junfeng Zhang,<sup>a</sup> Peng Wang,<sup>a,b</sup> Xiaoxing Wang,<sup>a</sup> Fei Pang,<sup>a,b</sup> Zhenzhou Zhang<sup>a,b</sup>  
and Yisheng Tan <sup>a,c\*</sup>**

a. State Key Laboratory of Coal Conversion, Institute of Coal Chemistry, Chinese Academy of Sciences, Taiyuan 030001, China;

b. University of Chinese Academy of Sciences, Beijing 100049, China;

c. National Engineering Research Center for Coal-Based Synthesis, Chinese Academy of Sciences, Taiyuan 030001, China.

**\*Correspondence to: Yisheng Tan Prof.** E-mail: tan@sxicc.ac.cn. Tel:+86-351-4044287.

Fax:+86-351-4044287

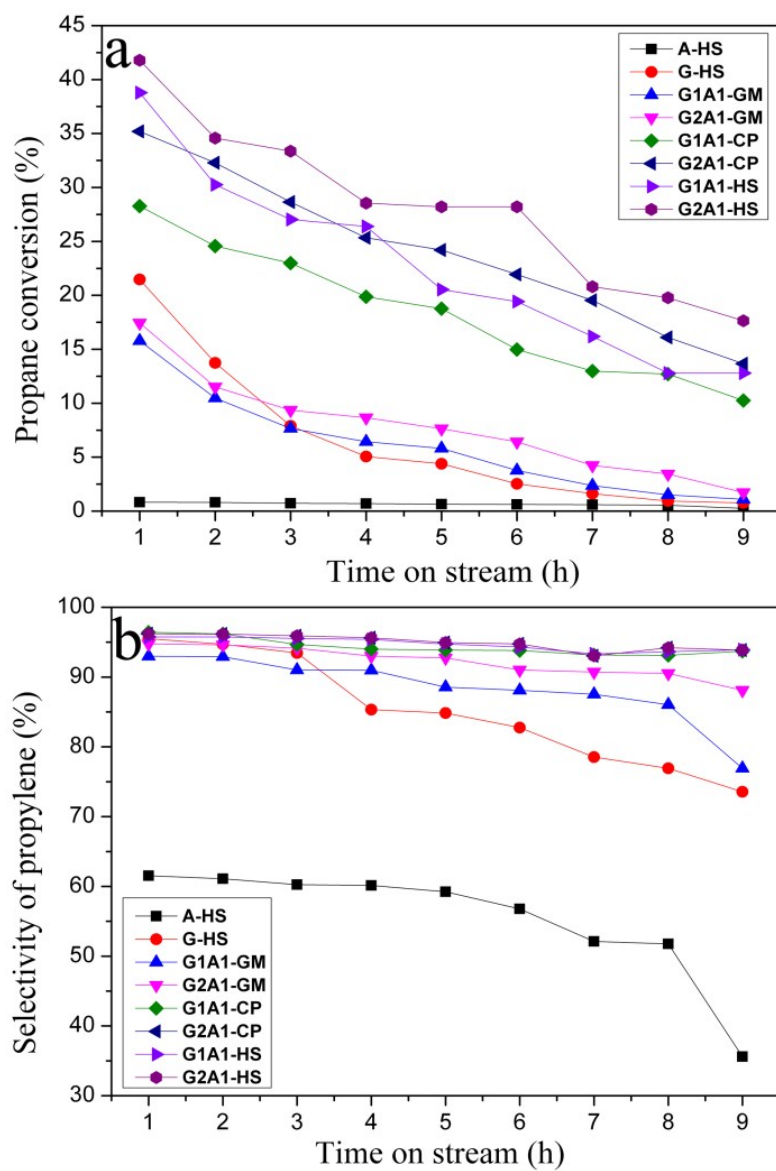

**Fig. S1** Propane conversion (a) and selectivity of propylene (b) as a function of time on stream for as-prepared samples. Reaction conditions:  $T = 550\text{ }^{\circ}\text{C}$ ;  $P = 100\text{ kPa}$ ;  $m_{\text{cat.}} = 150\text{ mg}$ ; the feed gas mixture  $\text{C}_3\text{H}_8/\text{CO}_2/\text{N}_2$  with the molar ratio of 1:3:27; total flow rate =  $15\text{ cm}^3\cdot\text{min}^{-1}$ .

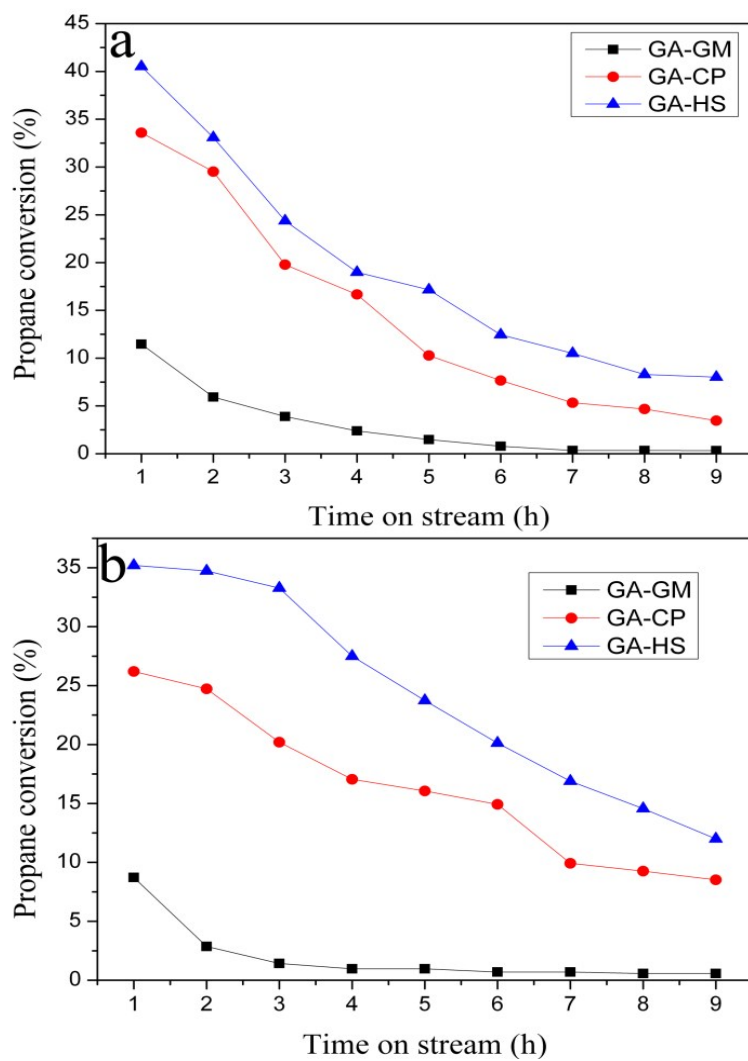

**Fig. S2** Propane conversion as a function of time on stream for as-prepared samples in reaction without (a) and with CO<sub>2</sub> (b).

**Table S1** Catalytic performance of different Ga<sub>2</sub>O<sub>3</sub>-Al<sub>2</sub>O<sub>3</sub> catalysts in the dehydrogenation of propane in the presence and absence of CO<sub>2</sub>.

| Sample             | Conversion (%)                |                 | Selectivity (%)               |                               |                               |                 |                 | Yield (%)                     |                    |
|--------------------|-------------------------------|-----------------|-------------------------------|-------------------------------|-------------------------------|-----------------|-----------------|-------------------------------|--------------------|
|                    | C <sub>3</sub> H <sub>8</sub> | CO <sub>2</sub> | C <sub>3</sub> H <sub>6</sub> | C <sub>2</sub> H <sub>6</sub> | C <sub>2</sub> H <sub>4</sub> | CH <sub>4</sub> | C <sub>3+</sub> | C <sub>3</sub> H <sub>6</sub> | H <sub>2</sub> /CO |
| GA-GM <sup>a</sup> | 8.7                           | 1.6             | 95.8                          | 0.3                           | 1.8                           | 1.6             | 0.5             | 8.3                           | 0.7                |
| GA-GM <sup>b</sup> | 11.4                          | /               | 90.8                          | 0.5                           | 4.9                           | 2.9             | 0.9             | 10.4                          | /                  |
| GA-CP <sup>a</sup> | 26.2                          | 4.3             | 95.2                          | 0.2                           | 2.2                           | 1.9             | 0.5             | 24.9                          | 0.6                |
| GA-CP <sup>b</sup> | 33.6                          | /               | 91.2                          | 0.3                           | 3.8                           | 3.5             | 1.2             | 30.6                          | /                  |
| GA-HS <sup>a</sup> | 35.2                          | 8.4             | 95.1                          | 0.2                           | 2.1                           | 2.0             | 0.6             | 33.4                          | 0.3                |
| GA-HS <sup>b</sup> | 40.5                          | /               | 92.1                          | 0.4                           | 3.6                           | 2.8             | 1.1             | 37.3                          | /                  |

<sup>a</sup> Reaction conditions: T = 550 °C; P = 100 kPa; m<sub>cat.</sub> = 150 mg; the feed gas mixture C<sub>3</sub>H<sub>8</sub>/CO<sub>2</sub>/N<sub>2</sub> with the molar ratio of 1:3:27; total flow rate = 15 cm<sup>3</sup>·min<sup>-1</sup>; reaction time = 1h.

<sup>b</sup> Reaction conditions: T = 550 °C; P = 100 kPa; m<sub>cat.</sub> = 150 mg; the feed gas mixture C<sub>3</sub>H<sub>8</sub>/N<sub>2</sub> with the molar ratio of 1:30; total flow rate = 15 cm<sup>3</sup>·min<sup>-1</sup>; reaction time = 1h.

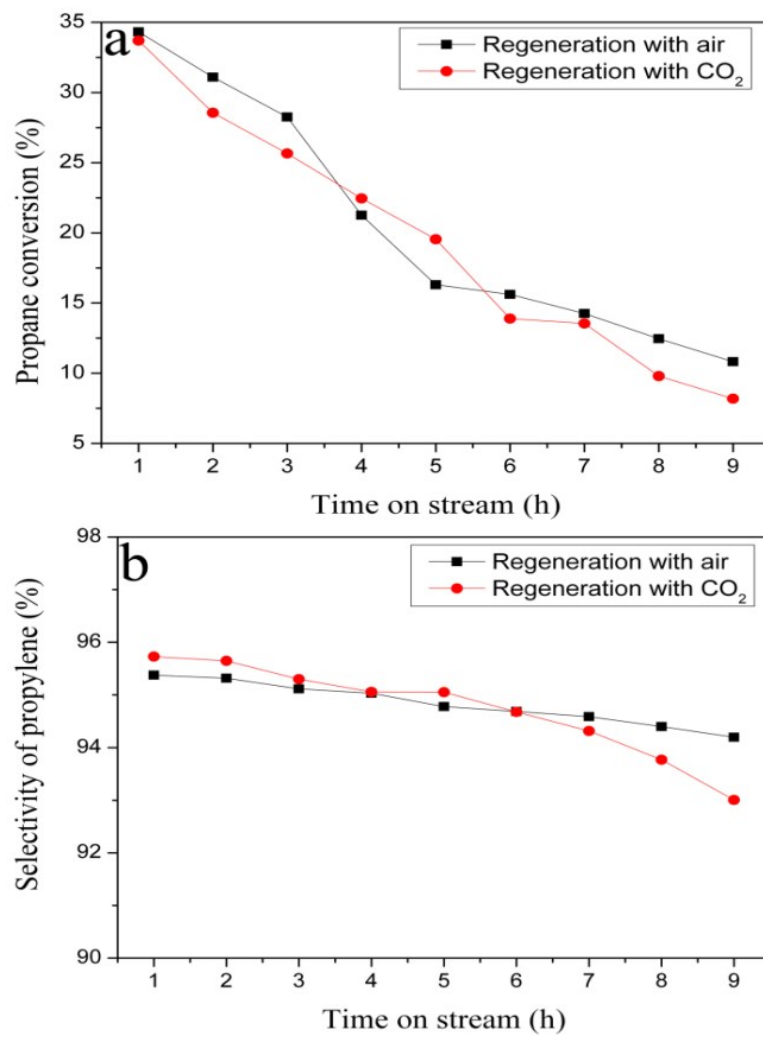

**Fig. S3** Propane conversion (a) and selectivity of propylene (b) as a function of time on stream for GA-HS after regeneration with air or CO<sub>2</sub>.

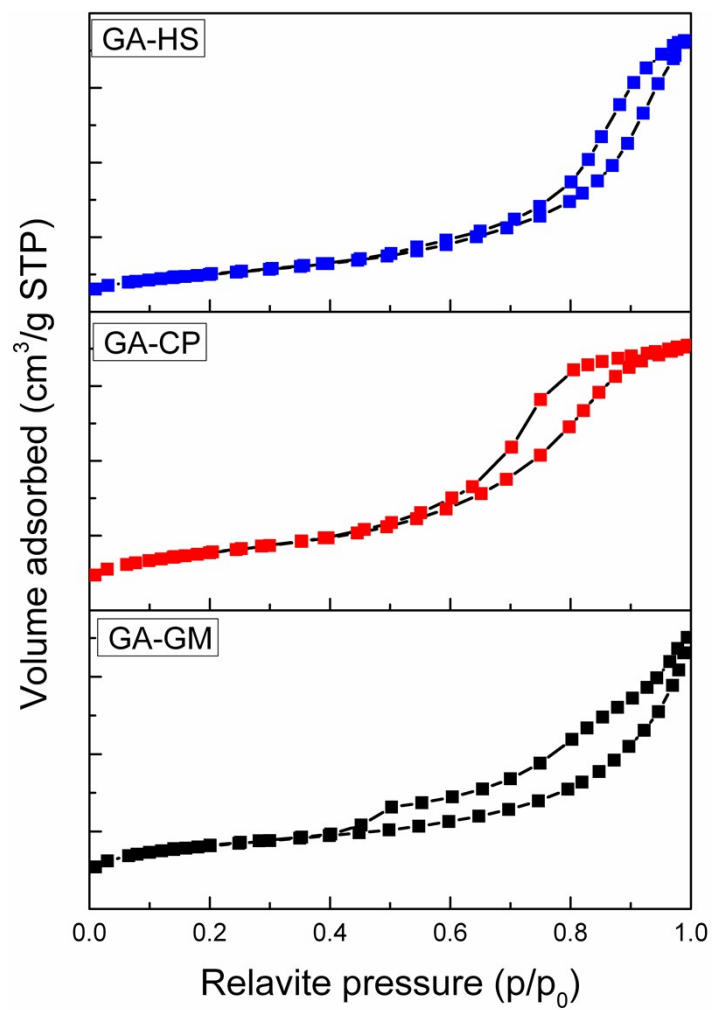

**Fig. S4** Nitrogen adsorption–desorption isotherms for different catalysts.

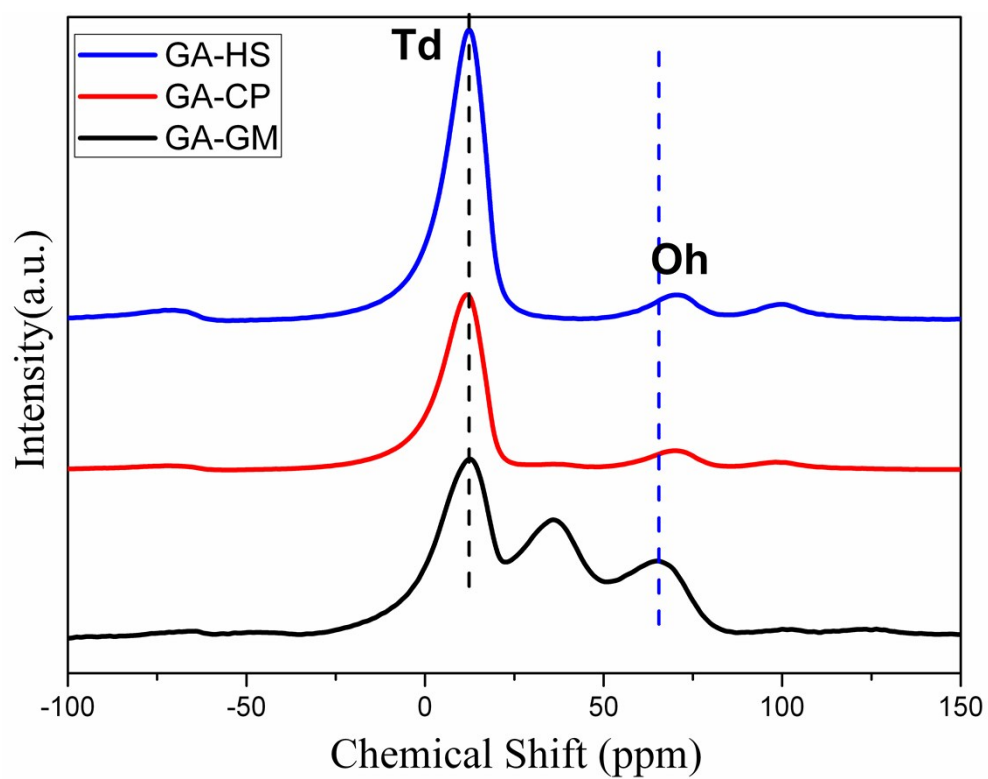

**Fig. S5**  $^{27}\text{Al}$  MAS NMR profiles for as-prepared catalysts.

**Table S2**  $\text{Al}^{\text{T}}$  percentage for as-prepared catalysts.

| Sample | $\text{Al}^{\text{T}}$ (%) |
|--------|----------------------------|
| GA-GM  | 0.677                      |
| GA-CP  | 0.913                      |
| GA-HS  | 0.936                      |

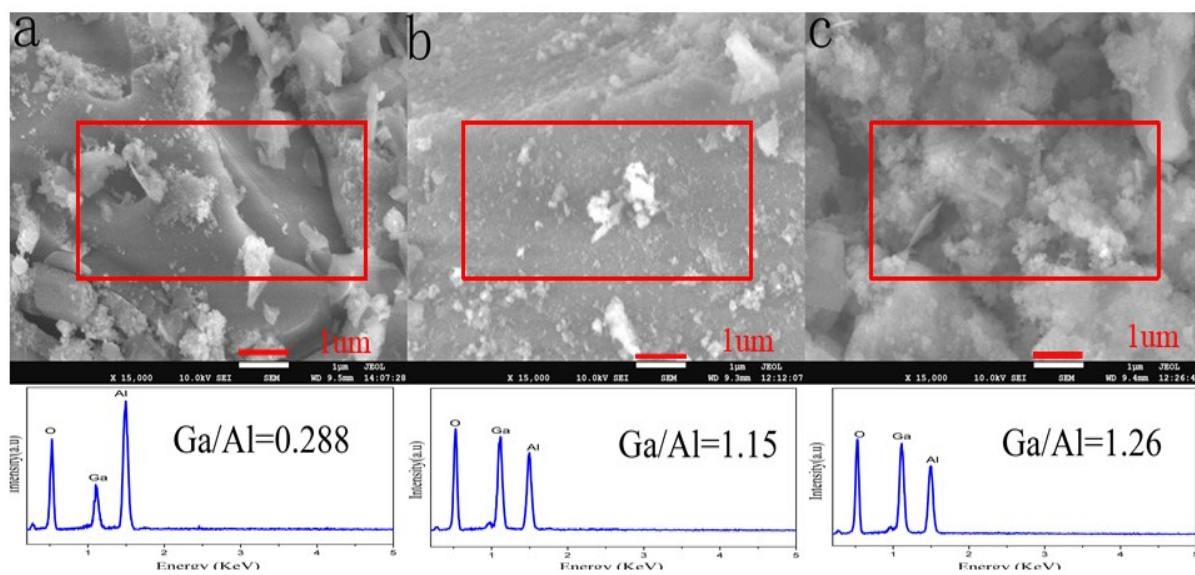

**Fig. S6** SEM images of the different as-prepared catalysts: (a) GA-GM; (b) GA-CP; (c) GA-HS.



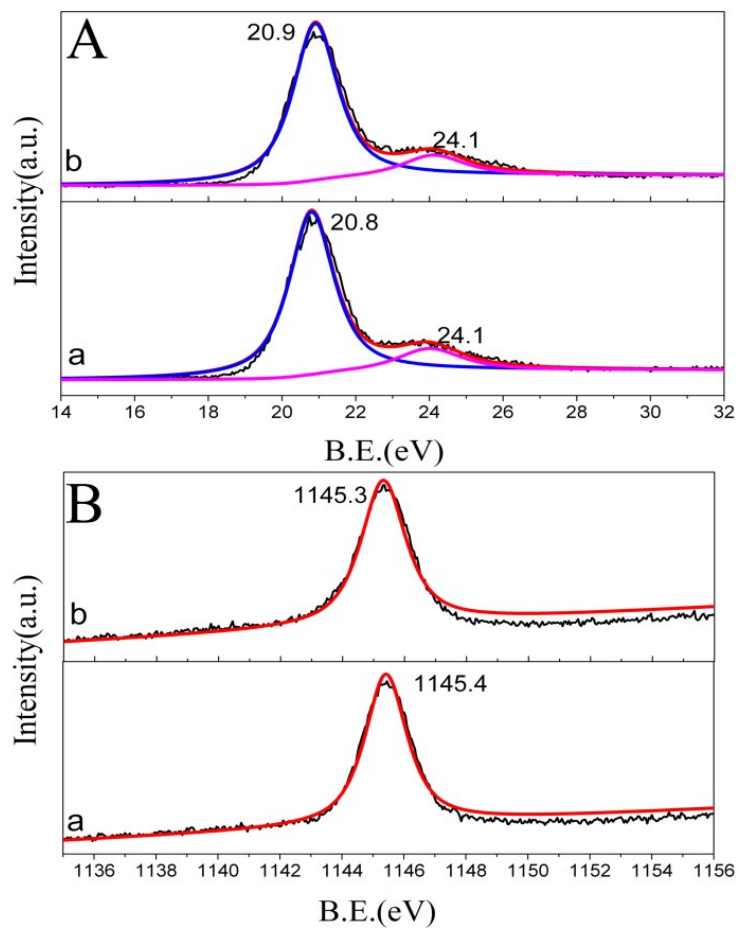

**Fig. S7** Ga 3d XPS (A) and Ga 2p<sub>1/2</sub> XPS (B) profiles of spent GA-HS after reactions with (a) and without CO<sub>2</sub> (b).

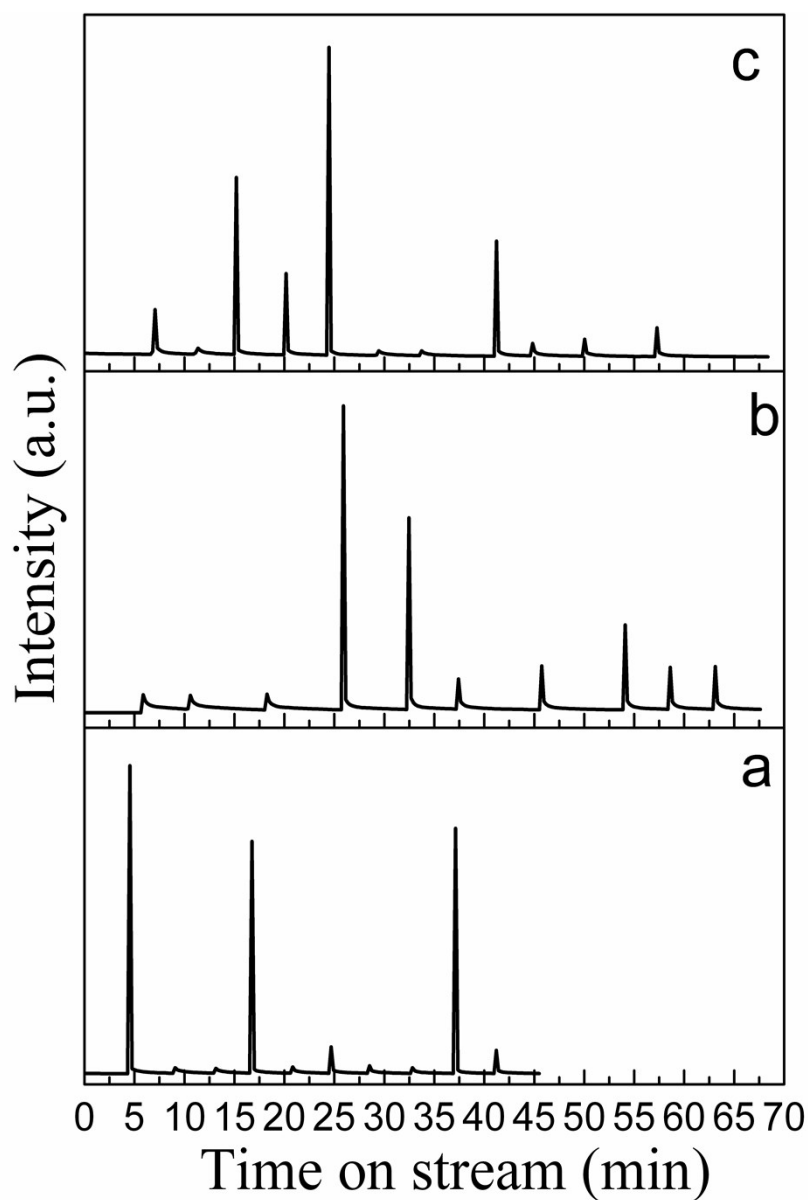

**Fig. S8(a-c)** Transient responses of  $m/z = 44$  ( $C_3H_8$ ) over as-prepared catalysts against a pulsed introduction of  $C_3H_8$  under steady flow of pure Ar. Reaction conditions: catalyst = 100 mg; Ar carrier =  $30 \text{ mlmin}^{-1}$ ;  $C_3H_8 = 1 \text{ ml}$ ; furnace temperature =  $550^\circ\text{C}$ . (a) GA-GM; (b) GA-SS; (c) GA-HS.

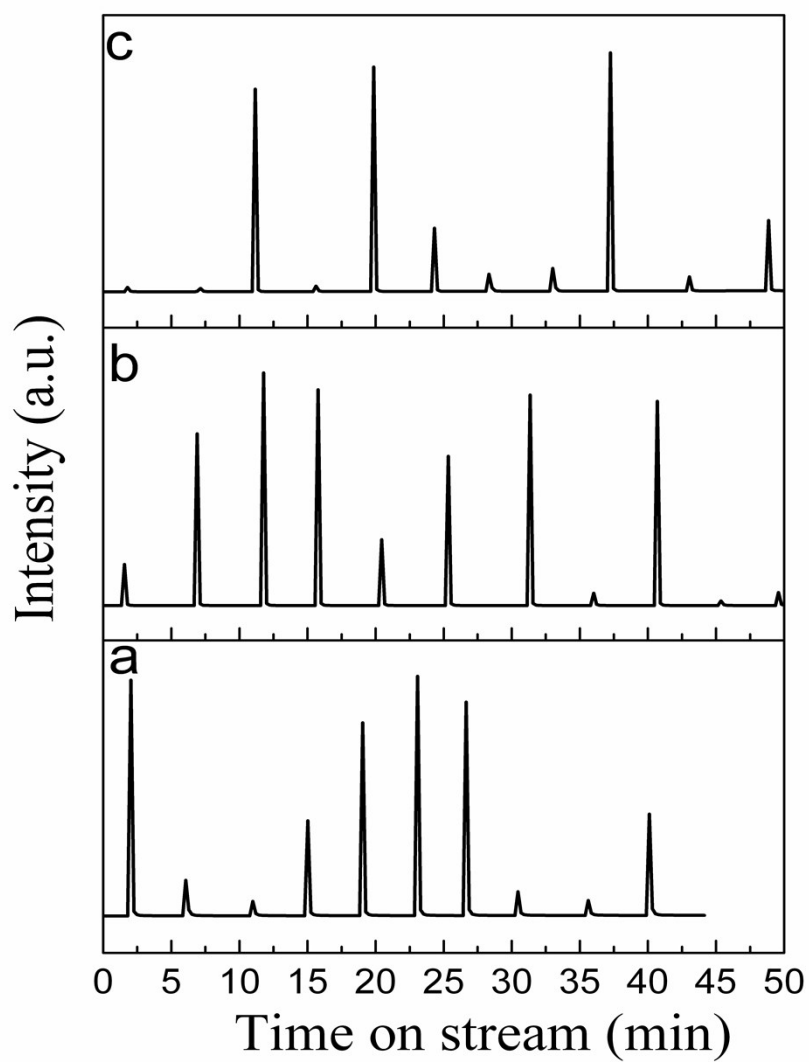

**Fig. S9(a-c)** Transient responses of  $m/z = 43$  ( $C_3H_8$ ) over as-prepared catalysts against a pulsed introduction of  $C_3H_8$  under steady flow of mixture gas (10% $CO_2$  and 90%Ar). Reaction conditions: catalyst = 100 mg;  $CO_2$  and Ar carrier = 30  $ml\min^{-1}$ ;  $C_3H_8$  = 1 ml; furnace temperature = 550°C. (a) GA-GM; (b) GA-SS; (c) GA-HS.
